# Supplementary material
Source: Springer Nature journal article supplement (https://www.springermedizin.de/resource/supplementary/12889_2013_5726_MOESM1_ESM.pdf/9496114)
Supplement: MOESM1 [file 9496114]

Additional file 1

Table S1 Categories and frequencies in the different questionnaires used in the MoBa study

|                                                                                                                                                                                                                                                                                                                                                                                                                                                                                                   |
|---------------------------------------------------------------------------------------------------------------------------------------------------------------------------------------------------------------------------------------------------------------------------------------------------------------------------------------------------------------------------------------------------------------------------------------------------------------------------------------------------|
| <b>Questionnaire 5 - 18 months</b>                                                                                                                                                                                                                                                                                                                                                                                                                                                                |
| How often do you give your child the following to eat/drink now that he/she is 18 months old?                                                                                                                                                                                                                                                                                                                                                                                                     |
| <b>Version 1 (n = 108)</b><br><i>Fruit (1 variable)</i><br><i>Vegetables (3 variables): Peas, beans - Other cooked vegetables - Raw vegetables</i><br><i>SSB (2 variables): Cordial, sweetened - Fizzy drinks</i><br>FQ: Never/seldom, 1-3 times a week, 4-6 times a week, At least once a day                                                                                                                                                                                                    |
| <b>Version 2 (n = 8197)</b><br><i>Fruit (1 variable)</i><br><i>Vegetables (3 variables): Peas, beans - Other cooked vegetables - Raw vegetables</i><br>Never, Less than once a week, 1-3 times a week, 4-6 times a week, 1-2 times in 24 hours, 3 or more times in 24 hours<br><br><i>SSB (2 variables): Cordial, sweetened - Fizzy drinks</i><br>FQ: Never, Less than once a week, 1-3 times a week, 4-6 times a week, 1-2 times in 24 hours, 3-4 times in 24 hours, 5 or more times in 24 hours |
| <b>Questionnaire 6 - 36 months (n = 9025)</b>                                                                                                                                                                                                                                                                                                                                                                                                                                                     |
| How often does your child drink or eat the following at present?                                                                                                                                                                                                                                                                                                                                                                                                                                  |
| <i>Fruit (1 variable)</i><br><i>SSB (1 variable)</i><br>FQ: Seldom/less than once a week, 1-3 times a week, 4-6 times a week, Once in 24 hours, Twice in 24 hours, 3 times in 24 hours, 4 or more times in 24 hours                                                                                                                                                                                                                                                                               |

*Vegetables (2 variables): Cooked vegetables - Raw vegetables, salad*

FQ: Once a month or less often, 2-3 times a month, Once a week, Twice a week, 3 times a week, 4 times a week, 5 or more times a week

**Questionnaire 7 - 7 years (n = 9025)**

How often does your child usually drink/eat the following?

*Fruit (4 variables): Oranges, tangerines - Apples, pears, grapes - Bananas - Other fresh fruit or berries*

*Vegetables (4 variables): Carrots - Cabbage, cauliflower, broccoli - Salad - Other vegetables*

FQ: Never/seldom, 1-3 times a month, 1-2 times a week, 3-4 times a week, 5-6 times a week, Once a day or more often

*SSB (3 variables): Apple nectar, other nectar - Cordial, sweetened - Fizzy drinks*

FQ: FQ: Never, 1-3 glasses a month or less often, 1-3 glasses a week, 4-6 glasses a week, 1-3 glasses in 24 hours, 4 or more glasses in 24 hours

SSB: Sugar-sweetened beverages
